# Supplementary material for: Tauroursodeoxycholic Acid Supplementation in In Vitro Culture of Indicine Bovine Embryos: Molecular and Cellular Effects on the In Vitro Cryotolerance
Source: MDPI journal article supplement (doi:10.3390/ijms241814060), 2023-09-14
Supplement: s1 [file s1]

**Table S2:** Fold Change values of all tested genes: hatched blastocysts collected on days 8-9.

Control = 0  $\mu$ M of TUDCA; T50 = 50  $\mu$ M of TUDCA; T200 = 200  $\mu$ M of TUDCA; T1000 = 1000  $\mu$ M of TUDCA.

| Gene Symbol | Control  | Control  | Control  | Control  | Control  | T1000    | T1000    | T1000    | T1000    | T200     | T200     | T200     | T200     | T200     | T200     | T50      | T50      | T50      | T50      |
|-------------|----------|----------|----------|----------|----------|----------|----------|----------|----------|----------|----------|----------|----------|----------|----------|----------|----------|----------|----------|
| ACACA       | 0.072742 | 0.083371 | 0.155465 | 0.081119 | 0.082057 | 0.162898 | 0.135538 | 0.145134 | 0.14744  | 0.069807 | 0.115177 | 0.112634 | 0.079535 | 0.103981 | 0.12435  | 0.068139 | 0.152845 | 0.107841 | 0.029759 |
| ACSL3       | 1.345402 | 0.838713 | 0.770397 | 1.634997 | 1.548042 | 1.43584  | 1.682351 | 1.941946 | 1.67412  | 0.542416 | 1.686303 | 1.149759 | 1.120485 | 1.712373 | 1.661783 | 0.412051 | 0.756406 | 1.451679 | 0.382881 |
| AQP3        | 1.087433 | 0.513697 | 1.080046 | 0.824716 | 1.167666 | 0.640866 | 0.451305 | 1.277856 | 0.717695 | 0.510385 | 0.586043 | 0.404398 | 0.418097 | 0.764826 | 0.873986 | 0.269521 | 0.68013  | 0.516972 | 0.266671 |
| ACTB        | 18.72423 | 13.52913 | 4.832587 | 17.04441 | 18.34812 | 21.9464  | 19.23017 | 35.57227 | 24.67095 | 9.373377 | 13.77371 | 15.37125 | 11.71502 | 17.805   | 20.87522 | 12.54744 | 9.545597 | 17.99513 | 13.2758  |
| AGPAT9      | 0.114234 | 0.123206 | 0.087602 | 0.095298 | 0.092499 | 0.144821 | 0.119991 | 0.144421 | 0.135905 | 0.133394 | 0.167101 | 0.117941 | 0.099498 | 0.138932 | 0.151631 | 0.11696  | 0.136397 | 0.154101 | 0.049054 |
| AKR1B1      | 3.035926 | 2.65691  | 7.654777 | 3.246321 | 4.406611 | 2.090495 | 2.837238 | 1.282122 | 1.966639 | 2.823166 | 3.395359 | 2.433477 | 2.388887 | 4.524879 | 3.257076 | 1.89253  | 2.753952 | 3.584695 | 1.913635 |
| ARO         | 0.007262 | 0.002328 | 0.007349 | 0.003101 | 0.001518 | 1.6E-296 | 0.01348  | 0.012006 | 1.4E-100 | 0.003711 | 0.003664 | 0.000566 | 0.009486 | 0.006426 | 0.004909 | 0.004226 | 0.002496 | 0.005539 | 0.003433 |
| ATF4        | 0.08644  | 0.038699 | 0.009803 | 0.074947 | 0.058176 | 0.065492 | 0.084144 | 0.391973 | 0.129278 | 0.021221 | 0.063907 | 0.041872 | 0.042658 | 0.060744 | 0.05732  | 0.049468 | 0.038433 | 0.047458 | 0.103568 |
| ATF6        | 0.07789  | 0.07666  | 0.125571 | 0.100169 | 0.177649 | 0.157059 | 0.153328 | 0.288016 | 0.190721 | 0.125495 | 0.052942 | 0.111959 | 0.08636  | 0.110912 | 0.127584 | 0.048975 | 0.136936 | 0.171044 | 0.037347 |
| B2M         | 0.929597 | 0.865396 | 0.827426 | 1.043929 | 0.758572 | 0.839692 | 0.946619 | 0.830133 | 0.870658 | 1.091568 | 1.006348 | 0.883491 | 1.99335  | 1.307499 | 1.062378 | 1.179171 | 0.918879 | 1.085296 | 1.147644 |
| BAX         | 0.607915 | 0.535543 | 0.625648 | 0.528377 | 0.97943  | 0.605232 | 0.940859 | 0.870706 | 0.791539 | 0.861172 | 0.602463 | 0.917289 | 0.673834 | 0.835697 | 0.967684 | 0.325319 | 0.599967 | 0.844284 | 0.764306 |
| BID         | 0.03106  | 0.03822  | 0.017954 | 0.027927 | 0.031052 | 0.029342 | 0.029624 | 0.04048  | 0.032771 | 0.021087 | 0.049396 | 0.039068 | 0.019234 | 0.035382 | 0.05288  | 0.02936  | 0.025572 | 0.031988 | 0.040966 |
| CASP3       | 0.001515 | 0.002998 | 4.1E-296 | 0.005071 | 0.002926 | 0.009838 | 0.002764 | 0.001555 | 0.003484 | 0.000785 | 0.001825 | 0.003751 | 0.002651 | 0.004241 | 0.003883 | 0.00366  | 0.002166 | 0.003864 | 0.000698 |
| CASP9       | 0.055184 | 0.053935 | 0.038471 | 0.055676 | 0.057919 | 0.063929 | 0.092692 | 0.080778 | 0.078231 | 0.027373 | 0.109396 | 0.080602 | 0.076227 | 0.081348 | 0.096774 | 0.050184 | 0.040324 | 0.093747 | 0.038417 |
| CAT         | 0.237807 | 0.161723 | 0.169361 | 0.393843 | 0.168667 | 0.190203 | 0.253123 | 0.235986 | 0.224826 | 0.161639 | 0.181516 | 0.219518 | 0.104117 | 0.232992 | 0.285382 | 0.07855  | 0.163469 | 0.205408 | 0.124984 |
| CD40        | 0.010417 | 0.00947  | 0.028074 | 0.010509 | 0.004949 | 0.015242 | 0.007522 | 0.01919  | 0.013007 | 0.010928 | 0.023122 | 0.041292 | 0.015161 | 0.041714 | 0.01221  | 0.010762 | 0.013602 | 0.020878 | 0.002914 |
| DDIT3       | 0.038748 | 0.044014 | 0.025618 | 0.02315  | 0.026882 | 0.039238 | 0.019151 | 0.08767  | 0.040391 | 0.067445 | 0.048105 | 0.042243 | 0.030997 | 0.017483 | 0.03846  | 0.016441 | 0.063957 | 0.033658 | 0.028488 |
| DNMT1       | 0.06447  | 0.061352 | 0.035142 | 0.037131 | 0.025929 | 0.087529 | 0.066361 | 0.061971 | 0.066361 | 0.03979  | 0.068834 | 0.06673  | 0.027466 | 0.051064 | 0.041831 | 0.03866  | 0.065522 | 0.042034 | 0.008568 |
| DNMT3A      | 2.676528 | 2.481485 | 3.487315 | 2.995279 | 3.7053   | 3.378162 | 4.549091 | 3.051969 | 3.606575 | 2.901914 | 3.908138 | 3.516121 | 2.720606 | 2.912028 | 3.815935 | 1.512936 | 2.72203  | 2.653082 | 1.597074 |
| DNMT3B      | 0.834225 | 0.924526 | 0.897004 | 1.016408 | 0.731914 | 1.199599 | 0.867201 | 0.839519 | 0.955936 | 0.63556  | 1.387209 | 1.843862 | 0.918754 | 0.841985 | 1.627069 | 0.685525 | 1.604392 | 0.711647 | 0.431696 |
| E1F2A       | 0.342884 | 0.585013 | 0.625648 | 0.528377 | 0.97943  | 0.605232 | 0.940859 | 0.870706 | 0.791539 | 0.861172 | 0.602463 | 0.917289 | 0.673834 | 0.835697 | 0.967684 | 0.325319 | 0.599967 | 0.844284 | 0.764306 |
| ELOVL5      | 0.08952  | 0.128698 | 0.09951  | 0.129111 | 0.091192 | 0.238076 | 1.70034  | 0.18906  | 0.197083 | 0.137022 | 0.127546 | 0.089365 | 0.125404 | 0.14434  | 0.196187 | 0.093811 | 0.146669 | 0.120579 | 0.034835 |
| ELOVL6      | 0.828203 | 0.66892  | 0.902789 | 0.648977 | 0.826778 | 1.130936 | 0.507665 | 0.967769 | 0.704986 | 1.025389 | 1.14581  | 0.731476 | 1.203294 | 0.393362 | 1.338513 | 1.822948 | 1.271758 | 1.69117  |          |
| FADS2       | 0.670478 | 0.3326   | 1.045767 | 0.744605 | 1.091055 | 0.830588 | 0.871536 | 0.58458  | 0.750824 | 0.477923 | 1.285638 | 0.917348 | 0.718529 | 0.582581 | 1.130908 | 0.305594 | 0.72782  | 1.056848 | 0.113931 |
| FASN        | 0.397602 | 0.262872 | 0.303278 | 0.456123 | 0.348811 | 0.537927 | 0.341033 | 0.510064 | 0.454026 | 0.342196 | 0.531032 | 0.258465 | 0.35295  | 0.490579 | 0.58316  | 0.250206 | 0.317208 | 0.474469 | 0.190271 |
| FOXO3       | 0.012383 | 0.013296 | 0.016045 | 0.012442 | 0.012607 | 0.028706 | 0.018352 | 0.046467 | 0.029038 | 0.013858 | 0.02354  | 0.013974 | 0.014878 | 0.017549 | 0.029711 | 0.009942 | 0.022647 | 0.018737 | 0.013263 |
| G6PD        | 0.297343 | 0.413179 | 0.338182 | 0.243933 | 0.239128 | 0.218484 | 0.318615 | 0.633111 | 0.353255 | 0.299761 | 0.335695 | 0.23014  | 0.226441 | 0.38914  | 0.29921  | 0.486691 | 0.247588 | 0.364405 | 0.148634 |
| GAPDH       | 2.955072 | 2.088624 | 3.44038  | 3.8154   | 3.167661 | 2.083607 | 1.648111 | 1.891338 | 1.865908 | 3.124816 | 2.083237 | 2.424115 | 2.369644 | 3.573224 | 2.186229 | 3.066818 | 3.904223 | 2.786567 | 1.928527 |
| GATM        | 0.012426 | 0.007798 | 0.014559 | 0.007034 | 0.005326 | 0.015294 | 0.011035 | 0.016284 | 0.014009 | 0.009261 | 0.030772 | 0.010971 | 0.007674 | 0.012065 | 0.015371 | 0.004987 | 0.006701 | 0.004336 | 0.006282 |
| GFP2T       | 0.016046 | 0.020137 | 0.011305 | 0.004704 | 0.021198 | 0.020318 | 0.032331 | 0.028211 | 0.026465 | 0.014958 | 0.018413 | 0.009366 | 0.009794 | 0.006207 | 0.020289 | 0.007469 | 0.007333 | 0.016121 | 0.004605 |
| GLRX2       | 0.389365 | 0.571528 | 0.535922 | 0.363007 | 0.403257 | 0.554805 | 0.602475 | 0.44326  | 0.529191 | 0.309586 | 0.626376 | 0.641987 | 0.424425 | 0.502715 | 0.401796 | 0.298285 | 0.505994 | 0.56152  | 0.48861  |
| GPX1        | 0.166737 | 0.18912  | 0.246147 | 0.191829 | 0.142318 | 0.349481 | 0.193682 | 0.605701 | 0.344845 | 0.142064 | 0.202495 | 0.195989 | 1.79616  | 0.232934 | 0.319057 | 0.141882 | 0.199164 | 0.224672 | 0.186256 |
| GPX4        | 0.136927 | 0.099262 | 0.052965 | 0.089489 | 0.074872 | 0.174935 | 0.125455 | 0.395907 | 0.2051   | 0.135031 | 0.123148 | 0.107946 | 0.070225 | 0.207203 | 0.008665 | 0.166654 | 0.089461 | 0.131905 |          |
| GSK3A       | 0.219461 | 0.233408 | 0.266702 | 0.149567 | 0.16768  | 0.242534 | 0.231553 | 0.287331 | 0.252717 | 0.15211  | 0.241957 | 0.136434 | 0.124944 | 0.194263 | 0.207368 | 0.154942 | 0.275724 | 0.126771 | 0.18499  |
| HAND1       | 0.001074 | 0.005983 | 0.007424 | 0.006804 | 0.004574 | 0.02675  | 0.004304 | 0.04151  | 0.016845 | 1.5E-296 | 0.003894 | 0.00705  | 0.009601 | 0.008001 | 0.01269  | 0.002544 | 0.00944  | 0.002155 | 0.000826 |
| HIF1A       | 0.015317 | 0.013522 | 0.014387 | 0.010196 | 0.008566 | 0.052619 | 0.022248 | 0.026961 | 0.031605 | 0.017874 | 0.030995 | 0.020291 | 0.008794 | 0.021429 | 0.016037 | 0.029994 | 0.022952 | 0.015392 | 0.008328 |
| HMBS        | 0.095749 | 0.082415 | 0.178278 | 0.106495 | 0.100965 | 0.150055 | 0.13749  | 0.166444 | 0.151045 | 0.082426 | 0.11338  | 0.094487 | 0.078215 | 0.102304 | 0.14308  | 0.043317 | 0.103554 | 0.07804  | 0.072047 |
| HMOX1       | 0.177536 | 0.08082  | 0.069024 | 0.111237 | 0.084634 | 0.252871 | 0.197303 | 0.216643 | 0.221119 | 0.129991 | 0.119341 | 0.043317 | 0.052562 | 0.081664 | 0.217647 | 0.057748 | 0.098204 | 0.114408 | 0.005609 |
| HP1         | 0.037376 | 0.07423  | 0.054121 | 0.030437 | 0.02971  | 0.054681 | 0.060753 | 0.085209 | 0.065664 | 0.043826 | 0.085155 | 0.051198 | 0.043508 | 0.045376 | 0.089405 | 0.053221 | 0.083795 | 0.055763 | 0.055753 |
| HPRT1       | 0.20333  | 0.293228 | 0.131288 | 0.215526 | 0.200236 | 0.244203 | 0.239773 | 0.236525 | 0.240165 | 0.164601 | 0.154597 | 0.286241 | 0.089892 | 0.138107 | 0.15174  | 0.142114 | 0.204771 | 0.172569 | 0.157766 |
| HSPA1A      | 0.003346 | 0.003488 | 4.1E-296 | 0.003592 | 0.001156 | 0.003442 | 0.000897 | 0.003073 | 0.002117 | 0.002039 | 0.00334  | 0.000946 | 0.001521 | 0.005248 | 0.002689 | 0.002343 | 0.002188 | 0.001288 | 0.001406 |
| HSPA5       | 3.222967 | 2.556902 | 3.305209 | 2.913848 | 2.716267 | 3.35091  | 2.971619 | 2.305826 | 2.842458 | 3.076069 | 3.001906 | 2.916384 | 2.592967 | 2.133627 | 3.039009 | 1.697808 | 3.502228 | 3.662986 | 0.453884 |
| IFITM3      | 1.202466 | 2.256088 | 1.977881 | 0.897966 | 1.213327 | 1.923616 | 1.609519 | 2.267305 | 1.914879 | 1.53863  | 1.957951 | 1.404099 | 0.941728 | 1.247519 | 1.040257 | 1.119383 | 1.32612  | 0.73233  | 0.689524 |
| IFITM3      | 0.228468 | 0.120046 | 0.15387  | 0.076481 | 0.154605 | 0.423728 | 0.159655 | 0.969944 | 0.403372 | 0.212566 | 0.120023 | 0.166921 | 0.123757 | 0.020164 | 0.298273 | 0.048217 | 0.142743 | 0.320683 | 0.160543 |
| IGFBP2      | 0.228468 | 0.120046 | 0.15387  | 0.076481 | 0.154605 | 0.423728 | 0.159655 | 0.969944 | 0.403372 | 0.212566 | 0.120023 | 0.166921 | 0.123757 | 0.020164 | 0.298273 | 0.048217 | 0.142743 | 0.320683 | 0.160543 |
| IGFBP4      | 0.007144 | 0.002911 | 4.1E-296 | 0.001789 | 0.000592 | 0.009592 | 0.00185  | 0.003911 | 0.00411  | 0.007016 | 0.0087   | 0.004997 | 0.003581 | 4.6E-297 | 0.006634 | 0.002542 | 0.003797 | 0.006516 | 0.009104 |
| KEAP1       | 0.100662 | 0.10481  | 0.115643 | 0.108474 | 0.092756 | 0.168109 | 0.116956 | 0.200428 | 0.157964 | 0.177356 | 0.194081 | 0.115215 | 0.116432 | 0.173195 | 0.179581 | 0.048637 | 0.131034 | 0.156904 | 0.069202 |
