# Supplementary material for: Tauroursodeoxycholic Acid Supplementation in In Vitro Culture of Indicine Bovine Embryos: Molecular and Cellular Effects on the In Vitro Cryotolerance
Source: MDPI journal article supplement (doi:10.3390/ijms241814060), 2023-09-14
Supplement: s1 [file s1]

## Supplementary Materials:

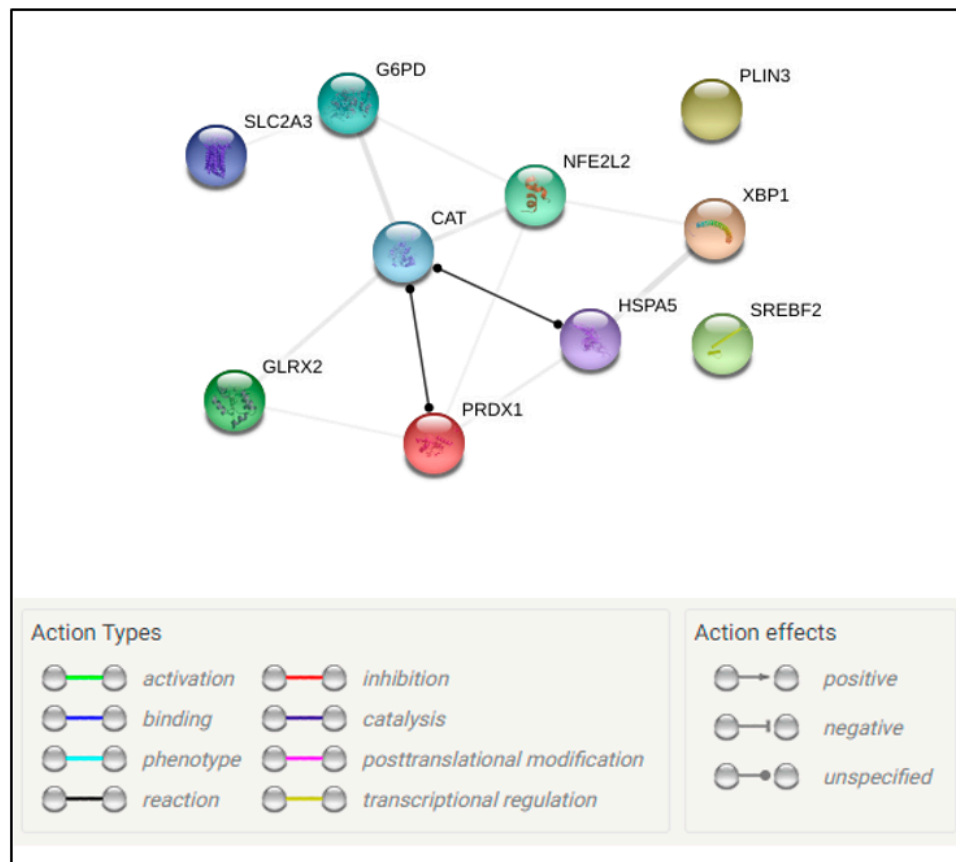

**Figure S1.** STRING network of protein-protein interactions between genes with trend or significant difference ( $P \leq 0.1$ ) of mRNA abundance among groups. Different line colors represent the relationship between the proteins translated from analyzed genes, as described on the legend.

**Table S1:** Gene symbol, functions and primers assay ID used for microfluidic expression analyses (Biomark HD System - Fluidigm).

| Gene Symbol | Function       | Assay ID*     |
|-------------|----------------|---------------|
| PPIA        | Reference gene | PA5-16914     |
| GAPDH       | Reference gene | Bt03210912_g1 |
| ACTB        | Reference gene | Bt03224617_g1 |

|              |                                                  |               |
|--------------|--------------------------------------------------|---------------|
| RPL30        | Reference gene                                   | Bt03226330_g1 |
| B2M          | Reference gene                                   | Bt03251628_m1 |
| HMBS         | Reference gene                                   | Bt03234763_m1 |
| HPRT1        | Reference gene                                   | Bt03225311_g1 |
| RLP15        | Reference gene                                   | Bt03288449_g1 |
| NFE2L2       | Oxidative stress and response to cellular stress | Bt03817661_m1 |
| KEAP1        | Oxidative stress and response to cellular stress | Bt03228713_m1 |
| CAT          | Oxidative stress and response to cellular stress | Bt03215423_g1 |
| SOD1         | Oxidative stress and response to cellular stress | Bt03215423_g1 |
| SOD2         | Oxidative stress and response to cellular stress | Bt03244551_m1 |
| GPX1         | Oxidative stress and response to cellular stress | Bt03259217_g1 |
| GPX4         | Oxidative stress and response to cellular stress | Bt03259611_m1 |
| PRDX1        | Oxidative stress and response to cellular stress | Bt03223684_m1 |
| PRDX3        | Oxidative stress and response to cellular stress | Bt03214402_m1 |
| ARO(CYP19A1) | Oxidative stress and response to cellular stress | Bt03213774_m1 |
| GFPT2        | Oxidative stress and response to cellular stress | Bt03250351_m1 |
| GLRX2        | Oxidative stress and response to cellular stress | Bt03229700_m1 |
| FOX3         | Oxidative stress and response to cellular stress | Bt03649334_s1 |
| TXNRD1       | Oxidative stress and response to cellular stress | Bt03215471_m1 |
| VNN1         | Oxidative stress and response to cellular stress | Bt03220248_m1 |
| H1F1A        | Oxidative stress and response to cellular stress | Bt03259341_m1 |
| HMOX1        | Oxidative stress and response to cellular stress | Bt03218624_m1 |
| EIF2A        | Endoplasmic reticulum stress                     | Bt03274460_m1 |
| HSPA5        | Endoplasmic reticulum stress                     | Bt03244880_m1 |
| HSPD1        | Endoplasmic reticulum stress                     | Bt04301470_g1 |
| HSPA1A       | Endoplasmic reticulum stress                     | Bt03292670_g1 |
| ATF4         | Endoplasmic reticulum stress                     | Bt03221057_m1 |
| ATF6         | Endoplasmic reticulum stress                     | Bt03287802_s1 |
| XBP1         | Endoplasmic reticulum stress                     | Bt03227621_g1 |
| DDIT3        | Endoplasmic reticulum stress                     | Bt03251320_g1 |
| DNMT1        | DNA methylation                                  | Bt03224737_m1 |

|              |                                                      |               |
|--------------|------------------------------------------------------|---------------|
| DNMT3A       | DNA methylation                                      | Bt01027164_m1 |
| DNMT3B       | DNA methylation                                      | Bt03259810_m1 |
| HP1          | DNA methylation                                      | Bt03246076_m1 |
| PAF1         | DNA methylation                                      | Bt03239371_g1 |
| NANOG        | Related to pluripotency and cell differentiation     | Bt03220541_m1 |
| POU5F1(OCT4) | Related to pluripotency and cell differentiation     | Bt03223846_g1 |
| HAND1        | Related to pluripotency and cell differentiation     | Bt04318733_g1 |
| REST         | Related to pluripotency and cell differentiation     | Bt03278318_s1 |
| IGFBP2       | Related to embryo development and cell proliferation | Bt01040719_m1 |
| IGFBP4       | Related to embryo development and cell proliferation | Bt03259500_m1 |
| SOX2         | Related to embryo development and cell proliferation | Bt03278318_s1 |
| IFITM3       | Related to embryo development and cell proliferation | Bt03292973_g1 |
| GSK3A        | Related to embryo development and cell proliferation | Bt03273698_g1 |
| KRT8         | Related to embryo development and cell proliferation | Bt03225178_g1 |
| LUM          | Related to embryo development and cell proliferation | Bt03211920_m1 |
| MTIF3        | Related to embryo development and cell proliferation | Bt03231844_m1 |
| TNF          | Related to embryo development and cell proliferation | Bt03259156_m1 |
| S100A10      | Related to embryo development and cell proliferation | Bt03215645_m1 |
| S100A14      | Related to embryo development and cell proliferation | Bt03230771_g1 |
| GATM         | Related to embryo development and cell proliferation | Bt03237896_m1 |
| BAX          | Related to apoptosis                                 | Bt03211777_g1 |
| CASP9        | Related to apoptosis                                 | Bt04282453_m1 |
| CASP3        | Related to apoptosis                                 | Bt03250954_g1 |
| BID          | Related to apoptosis                                 | Bt03241255_m1 |
| CD40         | Related to apoptosis                                 | Bt03817804_g1 |
| IL-1b        | Related to apoptosis                                 | Bt03212740_m1 |
| NFKB2        | Related to apoptosis                                 | Bt03272789_g1 |
| SREBF1       | Related to metabolism                                | Bt03276370_m1 |
| SREBF2       | Related to metabolism                                | Bt04283467_m1 |
| ACACA        | Related to metabolism                                | Bt03213360_m1 |
| ACSL3        | Related to metabolism                                | Bt04282138_m1 |

|        |                       |               |
|--------|-----------------------|---------------|
| ELOVL3 | Related to metabolism | Bt00907566_m1 |
| ELOVL5 | Related to metabolism | Bt03235956_m1 |
| ELOVL6 | Related to metabolism | Bt00907566_m1 |
| FADS2  | Related to metabolism | Bt03256255_g1 |
| FASN   | Related to metabolism | Bt03210471_g1 |
| AQP3   | Related to metabolism | Bt03253663_m1 |
| PGK1   | Related to metabolism | Bt03225854_mH |
| SLC2A3 | Related to metabolism | Bt03259513_g1 |
| SLC2A5 | Related to metabolism | Bt03258299_g1 |
| AKR1B1 | Related to metabolism | Bt03218049_g1 |
| G6PD   | Related to metabolism | Bt03649181_m1 |
| AGPAT9 | Related to metabolism | Bt04292093_m1 |
| PPARA  | Related to metabolism | Bt03220821_m1 |
| PLIN2  | Related to metabolism | Bt03212182_m1 |
| PLIN3  | Related to metabolism | Bt03230537_m1 |

---

\* Probes are inventoried by the ThermoFischer Scientific company (no primer sequence information)
