# Supplementary material for: Tauroursodeoxycholic Acid Supplementation in In Vitro Culture of Indicine Bovine Embryos: Molecular and Cellular Effects on the In Vitro Cryotolerance
Source: MDPI journal article supplement (doi:10.3390/ijms241814060), 2023-09-14
Supplement: s1 [file s1]

**Table S3:** Fold Change values of all tested genes: hatched embryos collected 24- and 48-hours post-warming. Control = 0  $\mu$ M of TUDCA; T200 = 200  $\mu$ M of TUDCA.

| Gene Symbol | Control  | Control  | Control  | Control  | T200     | T200     | T200     |
|-------------|----------|----------|----------|----------|----------|----------|----------|
| ACACA       | 0.020964 | 0.018653 | 0.036348 | 0.035991 | 0.017647 | 0.020053 | 0.02328  |
| ACSL3       | 0.499423 | 0.284436 | 0.46955  | 0.649971 | 0.189058 | 0.935528 | 1.311303 |
| AQP3        | 0.258977 | 0.301775 | 0.241916 | 0.306079 | 0.256937 | 0.255644 | 0.624477 |
| ACTB        | 5.065591 | 4.680116 | 6.661714 | 8.500149 | 4.616212 | 6.102507 | 8.145309 |
| AGPAT9      | 0.035315 | 0.060356 | 0.050949 | 0.03249  | 0.031629 | 0.032196 | 0.040697 |
| AKR1B1      | 1.640154 | 1.431481 | 1.171836 | 0.976882 | 1.113985 | 0.962934 | 0.804854 |
| ARO         | 0.002126 | 0.003318 | 0.003242 | 0.002857 | 0.001548 | 0.002253 | 0.019287 |
| ATF4        | 0.012666 | 0.008867 | 0.016154 | 0.023435 | 0.008827 | 0.005355 | 0.013908 |
| ATF6        | 0.008781 | 0.013419 | 0.060381 | 0.03831  | 0.03146  | 0.042761 | 0.117026 |
| B2M         | 0.389521 | 0.588998 | 0.45591  | 0.223711 | 0.508055 | 0.569331 | 0.93011  |
| BAX         | 0.210759 | 0.185051 | 0.271169 | 0.278935 | 0.146918 | 0.117339 | 0.240494 |
| BID         | 0.010269 | 0.01728  | 0.016134 | 0.006609 | 0.015025 | 0.028425 | 0.032473 |
| CASP3       | 0.001048 | 0.001075 | 0.001493 | 0.001426 | 0.000744 | 0.000995 | 0.004668 |
| CASP9       | 0.029834 | 0.030806 | 0.034873 | 0.025416 | 0.023321 | 0.031989 | 0.102554 |
| CAT         | 0.083635 | 0.052127 | 0.079413 | 0.075599 | 0.076957 | 0.131755 | 0.170389 |
| CD40        | 0.003259 | 0.003515 | 0.008793 | 0.005024 | 0.002733 | 0.003991 | 0.006071 |
| DDIT3       | 0.007335 | 0.007743 | 0.021897 | 0.006402 | 0.007013 | 0.011161 | 0.009148 |
| DNMT1       | 0.017661 | 0.017862 | 0.012945 | 0.01532  | 0.008965 | 0.016818 | 0.045773 |
| DNMT3A      | 1.125329 | 0.884875 | 1.124542 | 1.009384 | 0.860231 | 0.552479 | 0.553112 |
| DNMT3B      | 0.309759 | 0.317314 | 0.238654 | 0.349609 | 0.221845 | 0.127586 | 0.172924 |
| EIF2A       | 0.171029 | 0.243689 | 0.200734 | 0.100404 | 0.130537 | 0.287838 | 0.32671  |
| ELOVL5      | 0.050933 | 0.076467 | 0.051205 | 0.037188 | 0.065773 | 0.135569 | 0.201263 |
| ELOVL6      | 0.292133 | 0.335271 | 0.197707 | 0.156095 | 0.19138  | 0.480872 | 0.496256 |
| FADS2       | 0.298907 | 0.202367 | 0.244185 | 0.292517 | 0.206896 | 1.539482 | 1.277135 |
| FASN        | 0.141076 | 0.189455 | 0.123902 | 0.153812 | 0.156935 | 0.056067 | 0.108444 |
| FOXO3       | 0.009203 | 0.003861 | 0.008156 | 0.005031 | 0.006008 | 0.008021 | 0.028968 |
| G6PD        | 0.09677  | 0.179832 | 0.12597  | 0.085677 | 0.159571 | 0.250875 | 0.542983 |
| GAPDH       | 1.2329   | 0.949693 | 0.440886 | 0.85089  | 0.905616 | 3.189198 | 1.515432 |
| GATM        | 0.003838 | 0.001566 | 0.009587 | 0.008305 | 0.001851 | 0.004517 | 0.010615 |
| GFPT2       | 0.006851 | 0.007378 | 0.005188 | 0.004875 | 0.00669  | 0.009594 | 0.007235 |
| GLRX2       | 0.130825 | 0.164071 | 0.127498 | 0.091484 | 0.139386 | 0.037702 | 0.04058  |
| GPX1        | 0.083458 | 0.075739 | 0.091066 | 0.09588  | 0.094564 | 0.131717 | 0.186901 |
| GPX4        | 0.042286 | 0.050497 | 0.029869 | 0.059126 | 0.036627 | 0.068632 | 0.069695 |
| GSK3A       | 0.05415  | 0.068649 | 0.071528 | 0.070038 | 0.064544 | 0.075953 | 0.166654 |
| HAND1       | 0.000968 | 0.000674 | 0.00064  | 0.001129 | 0.001128 | 0.003406 | 0.031318 |
| HIF1A       | 0.004308 | 0.008655 | 0.009628 | 0.004658 | 0.003758 | 0.01547  | 0.038432 |
| HMB5        | 0.040377 | 0.030564 | 0.039014 | 0.035437 | 0.02569  | 0.015004 | 0.011186 |
| HMOX1       | 0.09794  | 0.055611 | 0.055808 | 0.07034  | 0.05281  | 0.036002 | 0.03577  |
| HP1         | 0.016613 | 0.02266  | 0.024078 | 0.012517 | 0.01649  | 0.00551  | 0.006488 |
| HPRT1       | 0.067279 | 0.079805 | 0.069171 | 0.055392 | 0.087595 | 0.060425 | 0.058463 |
| HSPA1A      | 0.000325 | 0.000744 | 0.00072  | 0.000913 | 0.000222 | 0.000571 | 0.001372 |
| HSPA5       | 0.771705 | 0.859802 | 1.452762 | 0.800788 | 0.771143 | 0.565498 | 0.675059 |
| HSPD1       | 0.45088  | 0.540375 | 0.517006 | 0.29092  | 0.583689 | 0.616332 | 0.823476 |
| IFITM3      | 0.001441 | 0.006728 | 0.010073 | 0.001566 | 0.013712 | 0.001465 | 0.019184 |
| IGFBP2      | 0.013913 | 0.034751 | 0.049919 | 0.054317 | 0.058593 | 0.008365 | 0.042058 |
| IGFBP4      | 0.000762 | 0.001879 | 0.001632 | 0.000655 | 0.001314 | 0.000157 | 0.030138 |
| KEAP1       | 0.040522 | 0.038717 | 0.064676 | 0.048564 | 0.042952 | 0.04339  | 0.093919 |
| KRT8        | 6.543332 | 5.731473 | 8.764871 | 6.524161 | 4.247452 | 4.264197 | 5.495975 |
| MTIF3       | 0.001629 | 0.001468 | 0.003519 | 0.000859 | 0.001286 | 0.002824 | 0.000686 |
| NANOG       | 0.001183 | 0.009544 | 0.004275 | 0.010359 | 0.00877  | 0.003432 | 0.016332 |
| NFE2L2      | 0.028642 | 0.035197 | 0.053603 | 0.037566 | 0.044101 | 0.111404 | 0.127907 |
| Nfkb2       | 0.030612 | 0.059775 | 0.084016 | 0.052995 | 0.053209 | 0.011629 | 0.010962 |
| PAF1        | 0.020557 | 0.036234 | 0.031426 | 0.025805 | 0.020118 | 0.071747 | 0.171342 |
| PGK1        | 0.052851 | 0.080907 | 0.038979 | 0.030728 | 0.057167 | 0.066785 | 0.051376 |
| PLIN2       | 0.079941 | 0.092854 | 0.107292 | 0.074473 | 0.084561 | 0.138582 | 0.282484 |
| PLIN3       | 1.635485 | 1.072847 | 1.129048 | 1.473752 | 0.881547 | 0.229774 | 0.299923 |
| POU5F1      | 0.213381 | 0.222001 | 0.355504 | 0.279845 | 0.300016 | 0.218193 | 1.001654 |
| PPIA        | 1.715144 | 1.683531 | 1.246991 | 1.069587 | 1.607036 | 1.567653 | 1.260317 |
| PRDX1       | 2.372117 | 2.783276 | 1.656027 | 1.55351  | 2.362601 | 7.118065 | 5.101633 |
| PRDX3       | 0.042314 | 0.036453 | 0.024147 | 0.030702 | 0.028713 | 0.032793 | 0.086296 |
| REST        | 0.058014 | 0.05584  | 0.078911 | 0.08349  | 0.052582 | 0.173663 | 0.283958 |
| RPL15       | 0.003735 | 0.002513 | 0.008141 | 0.009474 | 0.000166 | 0.013556 | 0.005646 |
| RPL30       | 0.66607  | 0.800835 | 0.9179   | 0.665766 | 0.641296 | 0.321495 | 0.386397 |
| S100A10     | 0.342959 | 0.51472  | 0.275693 | 0.330619 | 0.30648  | 0.895554 | 1.383877 |
| S100A14     | 1.105156 | 0.6022   | 0.700057 | 1.138273 | 0.37755  | 0.625653 | 0.350826 |
| SLC2A3      | 0.354705 | 0.371351 | 0.217363 | 0.280181 | 0.328747 | 0.623366 | 0.728985 |
| SLC2A5      | 0.073844 | 0.066828 | 0.14206  | 0.232735 | 0.030024 | 0.009438 | 0.030621 |
| SOD1        | 0.283942 | 0.244129 | 0.320243 | 0.190976 | 0.208252 | 0.188571 | 0.249459 |
| SOX2        | 0.000572 | 0.001289 | 0.001697 | 0.001247 | 0.000604 | 0.000709 | 0.014983 |
| SREBF1      | 0.01579  | 0.008851 | 0.020996 | 0.009284 | 0.005745 | 0.01468  | 0.045848 |
| SREBF2      | 0.051298 | 0.042415 | 0.043896 | 0.066513 | 0.037422 | 0.004723 | 0.016717 |
| TXNRD1      | 0.046089 | 0.063896 | 0.103432 | 0.064911 | 0.068523 | 0.059271 | 0.126892 |
| XBP1        | 0.109959 | 0.131812 | 0.165811 | 0.252728 | 0.024436 | 0.063385 | 0.091948 |
